# Supplementary material
Source: publisher figshare collection journal article supplement (https://tandf.figshare.com/ndownloader/files/16745228)
Supplement: Supplementary file 1 [file 16745228]

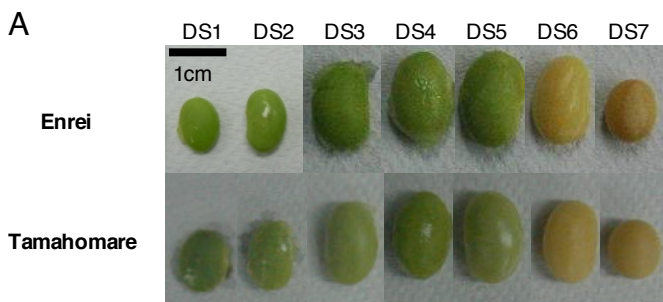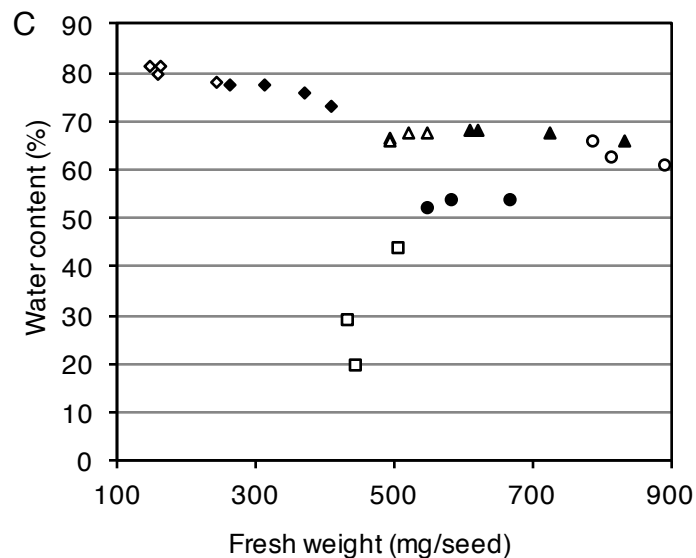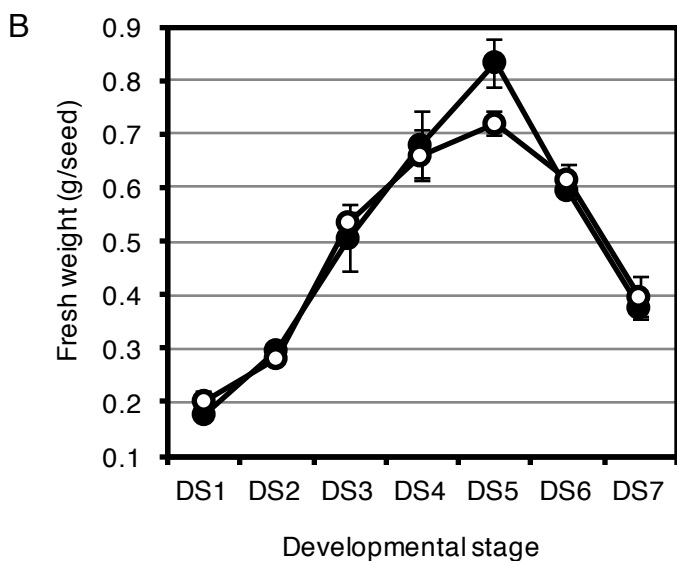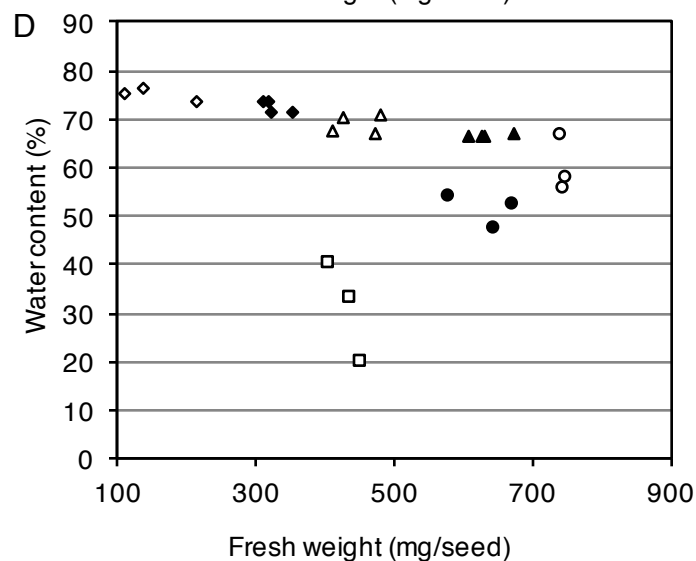

**Supplemental Figure 1.** Definition of the developmental stages in immature soybean seeds, designated according to the seed fresh (FW) weight from the early stage to the late stage of maturation in turn: DS1 (100-250 mg), DS2 (250-400 mg), DS3 (400-600 mg) and DS4 (600-700 mg), DS5 (700-900 mg), DS6 (900-600 mg), and DS7 (600-300 mg). **A:** Appearance of the immature seeds. **B:** Distribution of fresh weights of seeds that were used for analyses. White circles: Enrei. Black circles: Tamahomare. Error bar: std. dev. (n 3). **C:** Enrei seed water content (WC). Each plot indicates the average of WC from three or four seeds. White diamonds: DS1, black diamonds: DS2, white triangles: DS3, black triangles: DS4, white circles: DS5, black circles: DS6, and white squares: DS7. **D:** Tamahomare seed WC. Symbols for the stages are as described for Enrei.

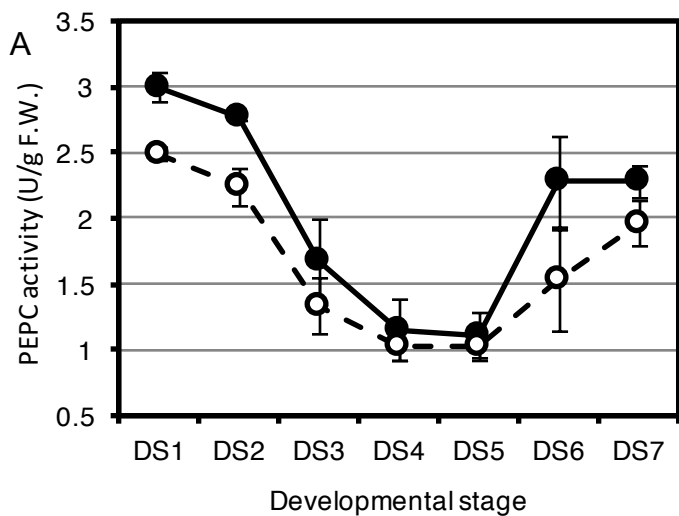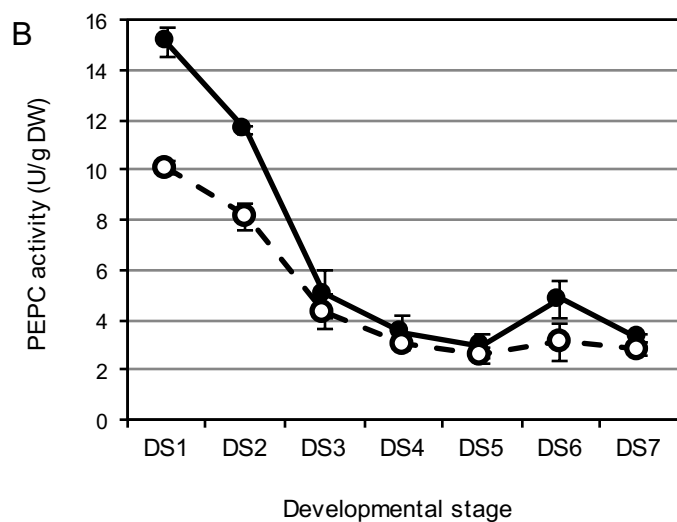

**Supplemental Figure 2.** Changes in (A) PEPC activity per fresh weight (FW) and (B) PEPC activity per dry weight (DW) during seed maturation. Black circles: Enrei. White circles: Tamahomare. Error bar: std. error (n = 3).

Supplementary Table 1. Changes in water content and fresh weight of sampled see from plants of two cultivars, Enrei and Tamahomare, during maturation.

| Enrei          |                    |        |        |        |        |        |        |        |
|----------------|--------------------|--------|--------|--------|--------|--------|--------|--------|
| Fraction       |                    | DS1    | DS2    | DS3    | DS4    | DS5    | DS6    | DS7    |
| Date           |                    | 8/20   | 9/1    | 9/1    | 9/11   | 9/16   | 9/25   | 9/25   |
| Sample count   |                    | 4      | 4      | 4      | 4      | 3      | 3      | 3      |
| Water cont.(%) | Av.* <sup>1</sup>  | 80.2   | 76.1   | 67.0   | 67.5   | 60.4   | 44.6   | 30.5   |
|                | S.E.* <sup>2</sup> | (0.7)  | (1.0)  | (0.4)  | (0.6)  | (4.5)  | (3.9)  | (3.2)  |
| Fresh wt.(mg)  | Av.* <sup>1</sup>  | 176.8  | 338.4  | 512.6  | 696.5  | 834.9  | 602.3  | 462.5  |
|                | S.E.* <sup>2</sup> | (21.8) | (32.0) | (13.1) | (52.4) | (31.3) | (14.2) | (12.4) |

  

| Tamahomare     |                    |        |       |        |        |       |        |        |
|----------------|--------------------|--------|-------|--------|--------|-------|--------|--------|
| Fraction       |                    | DS1    | DS2   | DS3    | DS4    | DS5   | DS6    | DS7    |
| Date           |                    | 9/11   | 9/16  | 9/16   | 9/25   | 10/4  | 10/14  | 10/14  |
| Sample count   |                    | 4      | 4     | 4      | 4      | 3     | 3      | 3      |
| Water cont.(%) | Av.* <sup>1</sup>  | 75.3   | 72.5  | 69.1   | 66.6   | 58.2  | 43.4   | 31.0   |
|                | S.E.* <sup>2</sup> | (0.7)  | (0.6) | (0.9)  | (0.1)  | (4.4) | (3.8)  | (3.2)  |
| Fresh wt (mg)  | Av. * <sup>1</sup> | 177.6  | 326.2 | 448.6  | 636.8  | 748.5 | 634.5  | 432.9  |
|                | S.E.* <sup>2</sup> | (32.2) | (9.7) | (17.0) | (14.0) | (1.8) | (14.5) | (12.0) |

\*<sup>1</sup> Average of values

\*<sup>2</sup> Standard error

Supplementary Table 2. Chemical compositions in mature seeds from individual plants of Cvs Enrei and Tamahomare.

| Compounds             | Enrei |       |         |                    | Tamahomare |       |         |                    | p value* <sup>4</sup> |      |          |
|-----------------------|-------|-------|---------|--------------------|------------|-------|---------|--------------------|-----------------------|------|----------|
|                       | n1    | n2    | n3      | Av.* <sup>2</sup>  | n1         | n2    | n3      | Av.* <sup>2</sup>  |                       |      |          |
|                       |       |       |         | Av.* <sup>2</sup>  |            |       |         | Av.* <sup>2</sup>  |                       |      |          |
|                       |       |       |         | S.E.* <sup>3</sup> |            |       |         | S.E.* <sup>3</sup> |                       |      |          |
|                       |       |       | % (DW)  |                    |            |       | % (DW)  |                    |                       |      |          |
| Protein* <sup>1</sup> | 49.1  | 46.8  | 47.7    | 47.9               | 0.65       | 41.4  | 42.1    | 44.0               | 42.5                  | 0.78 | 0.003    |
| Oil                   | 20.2  | 21.2  | 22.1    | 21.2               | 0.54       | 22.8  | 23.1    | 23.3               | 23.1                  | 0.14 | 0.027    |
| Carbohydrate          | 22.6  | 21.6  | 24.0    | 22.7               | 0.70       | 24.5  | 26.5    | 26.0               | 25.7                  | 0.59 | 0.032    |
|                       |       |       | mg/seed |                    |            |       | mg/seed |                    |                       |      |          |
| Protein* <sup>1</sup> | 135.1 | 132.4 | 130.2   | 132.6              | 1.41       | 103.9 | 102.0   | 106.0              | 104.0                 | 1.15 | 4.81E-05 |
| Oil                   | 55.6  | 60.0  | 60.2    | 58.6               | 1.50       | 57.2  | 56.1    | 56.0               | 56.4                  | 0.38 | 0.113    |
| Carbohydrate          | 62.3  | 61.0  | 65.4    | 62.9               | 1.31       | 61.5  | 64.3    | 62.6               | 62.8                  | 0.80 | 0.474    |

\*<sup>1</sup> Conversion factor from nitrogen to protein is 5.71.

\*<sup>2</sup> Average of values (n=3)

\*<sup>3</sup> Standard error

\*<sup>4</sup> Probability of difference between Enrei and Tamahomare in Student's T test.
